# Supplementary material for: Self-healing anti-corrosion coatings based on polymers of intrinsic microporosity for the protection of aluminum alloy
Source: Royal Society of Chemistry journal article supplement (doi:10.1039/c5ra19614k), 2015-01-01
Supplement: c5ra19614k1.pdf [file c5ra19614k1.pdf]

## Self-healing anti-corrosion coatings based on polymers of intrinsic microporosity for the protection of aluminum alloy

Zhen Li, Benye Qin, Xiaoyong Zhang, Ke Wang, Yen Wei\*, Yan Ji\*

The Key Laboratory of Bioorganic Phosphorus Chemistry & Chemical Biology, Department of  
Chemistry, Tsinghua University, Beijing 100084, China.

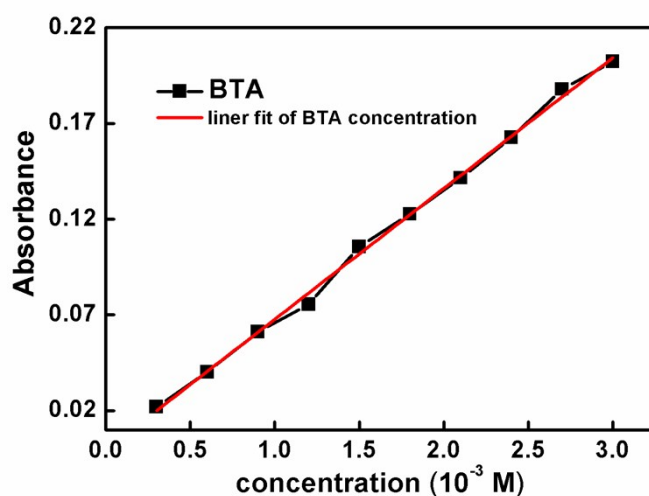

**Fig. S1** Standard curves of BTA aqueous solution (range in concentration from  $3 \times 10^{-4}$  M to  $3 \times 10^{-3}$  M). A fitting function was obtained as "Concentration ( $10^{-3}$  M) =  $14.62 \times$  Absorbance + 0.0104".

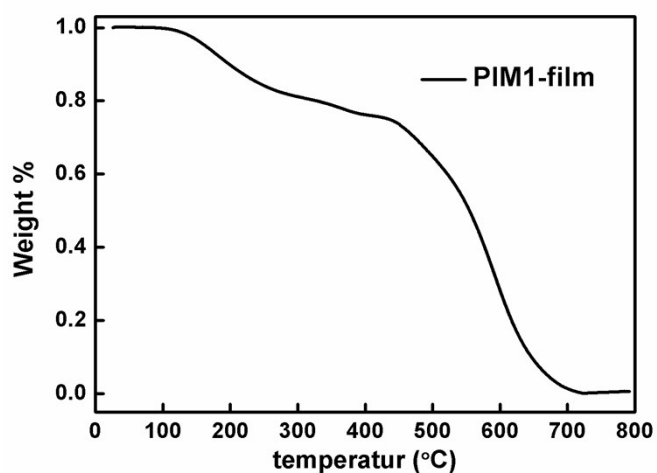

**Fig. S2** TGA curves of PIM1 film in air.

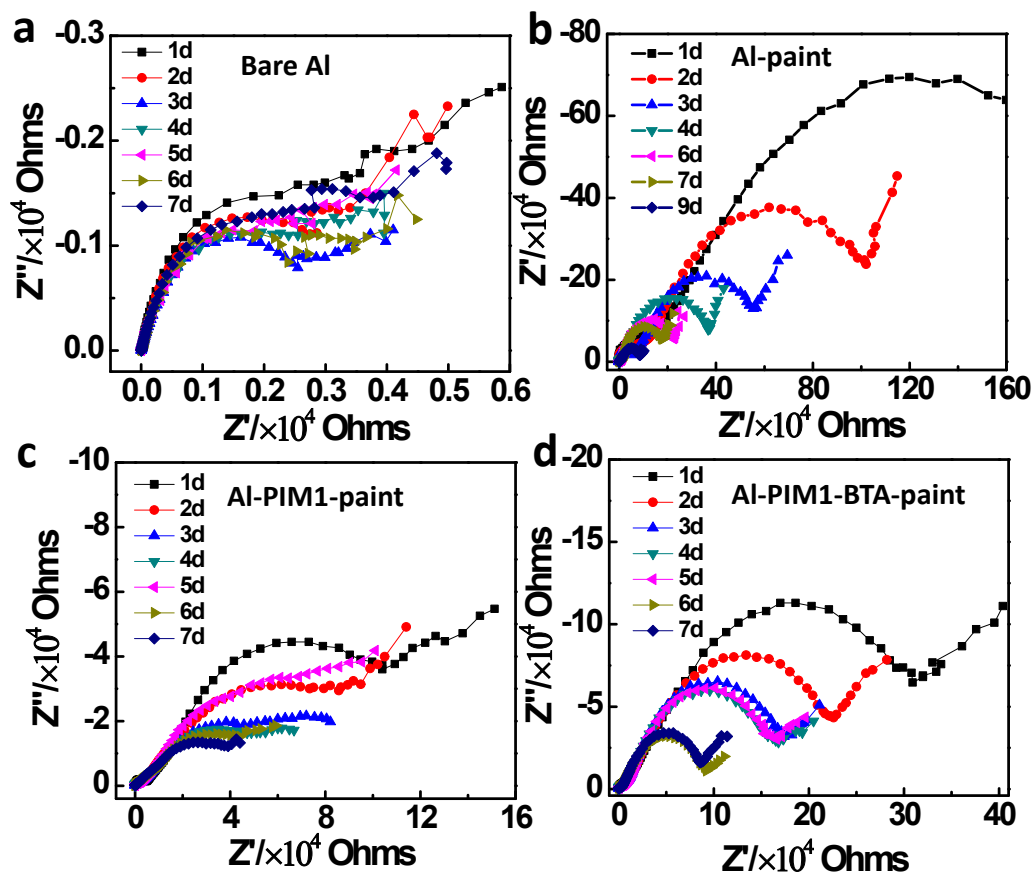

**Fig. S3** Nyquist plots during 7 days' immersion for intact samples: (a) Bare Al; (b) Al-paint; (c) Al-PIM1-paint; (d) Al-PIM1-BTA-paint.

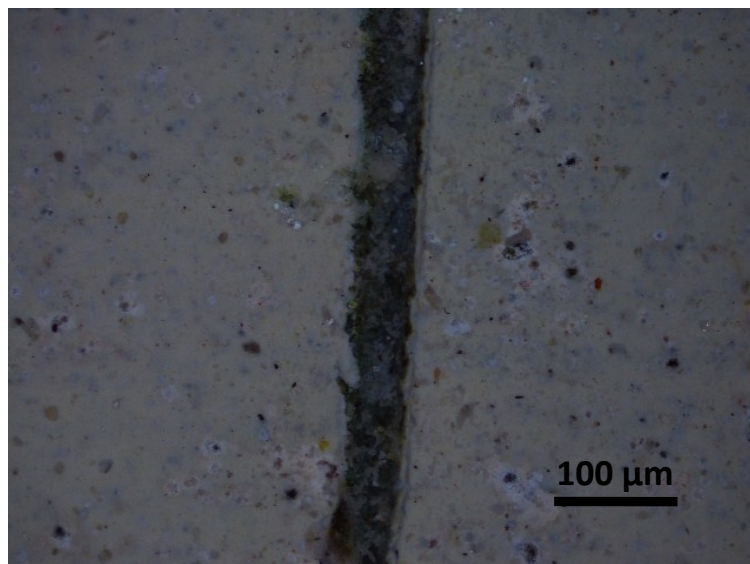

**Fig. S4** The optical microscope photo of an Al-paint sample with scratches (after 4 weeks' saline immersion).

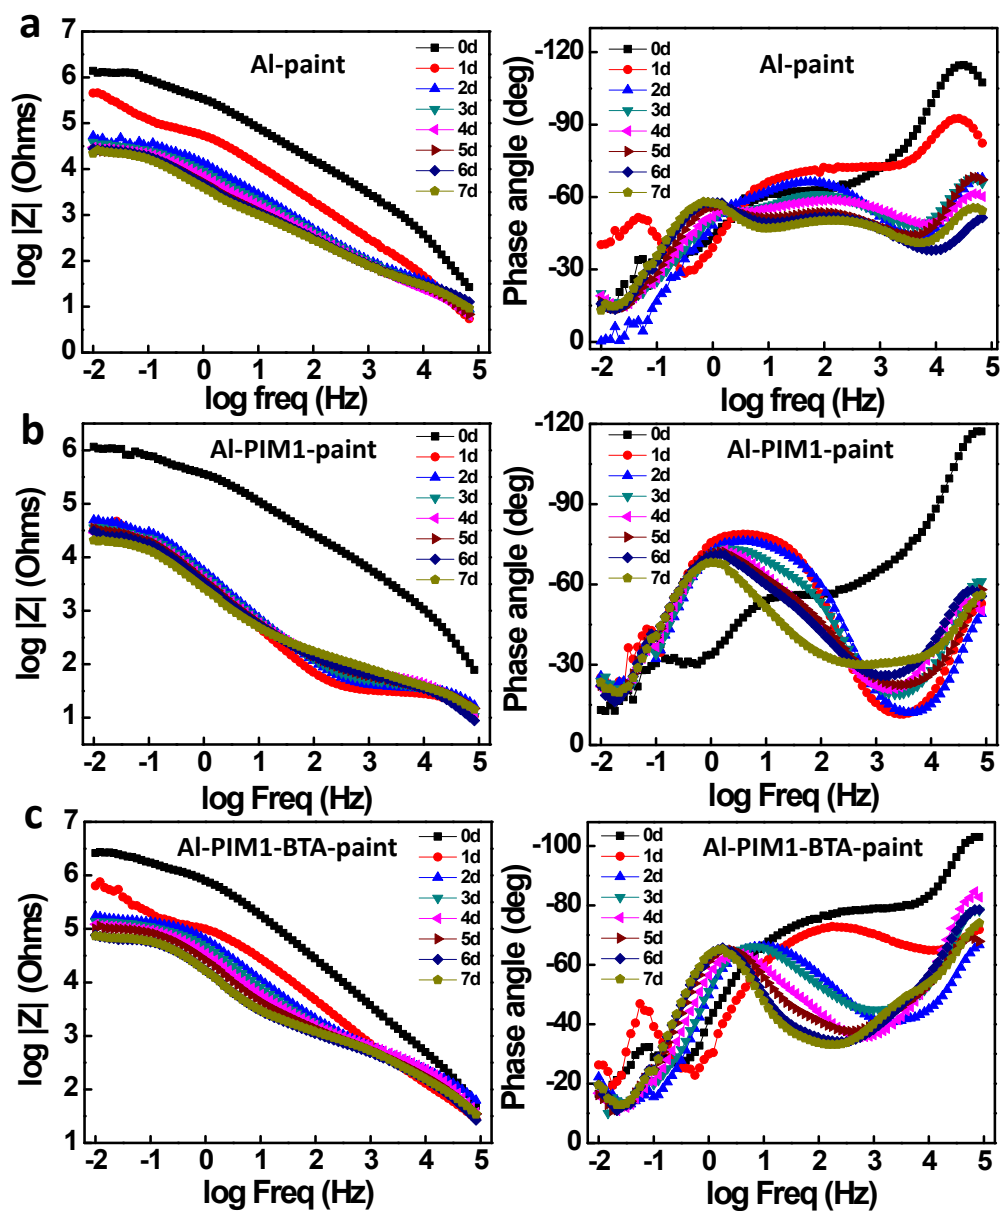

Fig. S5 Bode plots of different scratched samples (a) Al-paint; (b) Al-PIM1-paint; (c) Al-PIM1-BTA-paint during 7 days' immersion.

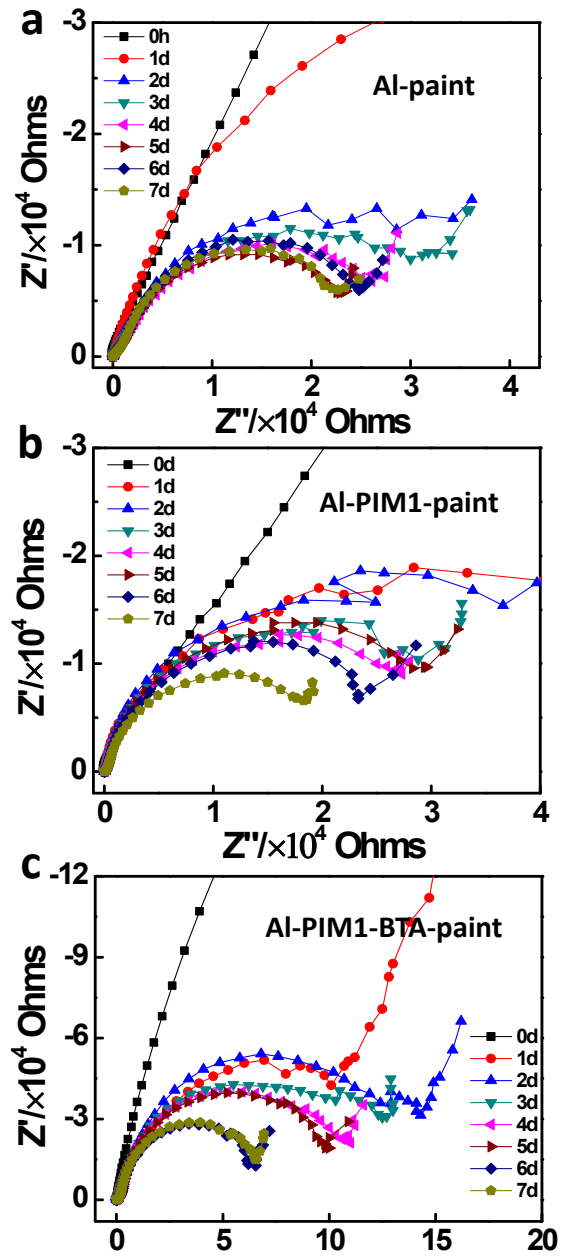

**Fig S6.** Nyquist plots of different scratched samples (a) Al-paint; (b) Al-PIM1-paint; (c) Al-PIM1-BTA-paint during 7 days' immersion.

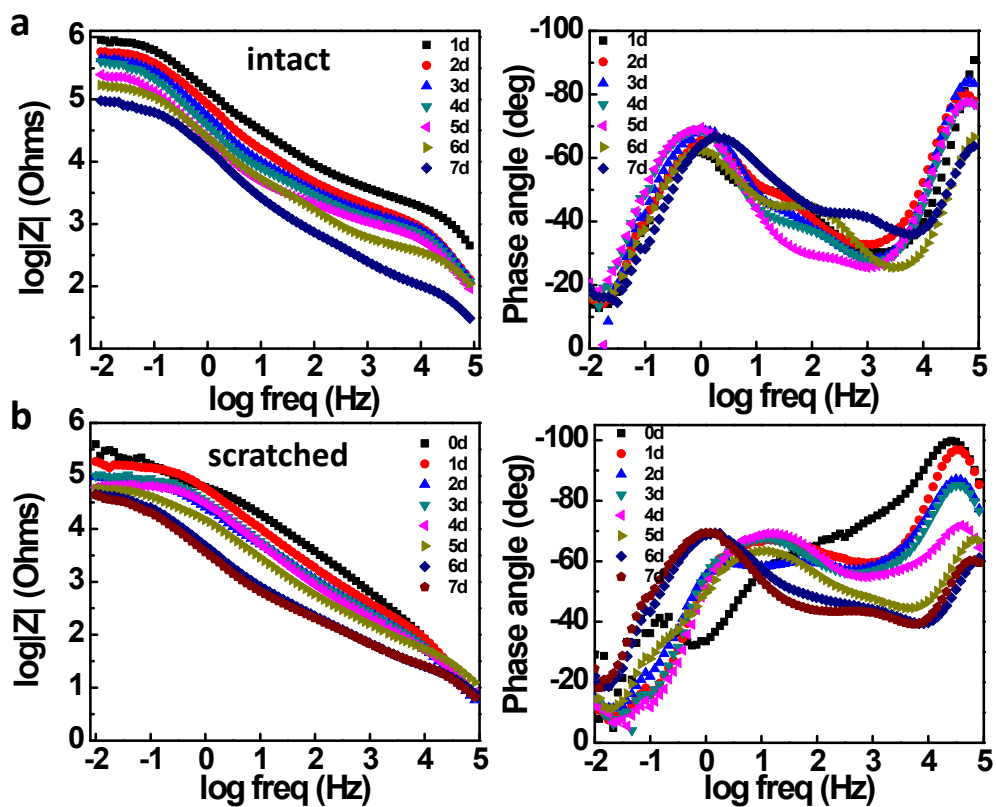

**Fig S7.** Bode plots of Al-paint-BTA samples during 7 days' immersion: (a) intact sample; (b) scratched sample.

|               | corrosion potential (V) | corrosion current (A) |
|---------------|-------------------------|-----------------------|
| paint         | -0.700                  | $3.66 \times 10^{-6}$ |
| PIM-paint     | -0.683                  | $1.47 \times 10^{-6}$ |
| PIM-BTA-paint | -0.642                  | $4.72 \times 10^{-7}$ |

**Table S1.** Corrosion potential and corrosion current of all scratched samples after 7 days' immersion.
